# Supplementary material for: Harnessing peptide–cellulose interactions to tailor the performance of self-assembled, injectable hydrogels
Source: Royal Society of Chemistry journal article supplement (doi:10.1039/d5me00009b), 2025-01-01
Supplement: d5me00009b1.pdf [file d5me00009b1.pdf]

## Electronic Supplementary Information

### Harnessing peptide-cellulose interactions to tailor the performance of self-assembled, injectable hydrogels

Jessica A. Thomas<sup>1</sup>, Alex H. Balzer<sup>2,3</sup>, Subhash Kalidindi<sup>2,3</sup>, LaShanda T.J. Korley<sup>1,2</sup>

<sup>1</sup>Materials Science and Engineering, University of Delaware, Newark, DE 19716, United States

<sup>2</sup>Chemical and Biomolecular Engineering, University of Delaware, Newark, DE 19716, United States

<sup>3</sup>Center for Plastics Innovation (CPI), University of Delaware, Newark, Delaware 19716, United States

#### Table of Contents

|                                                                       |       |
|-----------------------------------------------------------------------|-------|
| 1. <sup>1</sup> H nuclear magnetic resonance (NMR) spectra .....      | 2-3   |
| 2. Calculation of peptide weight fractions .....                      | 3     |
| 3. Gel permeation chromatography (GPC) data .....                     | 4     |
| 4. Amplitude sweeps of peptide-polyurea (PPU) hydrogels .....         | 5     |
| 5. Injection simulation plots .....                                   | 6     |
| 6. Deconvoluted photothermal infrared (PTIR) spectroscopy plots ..... | 7     |
| 7. Thermal analysis of PPU hydrogels .....                            | 8-11  |
| 8. Shear thinning behavior of PPU/CNC hydrogels .....                 | 12    |
| 9. Additional SEM and TEM images .....                                | 12-13 |
| 10. Abbreviations .....                                               | 14    |

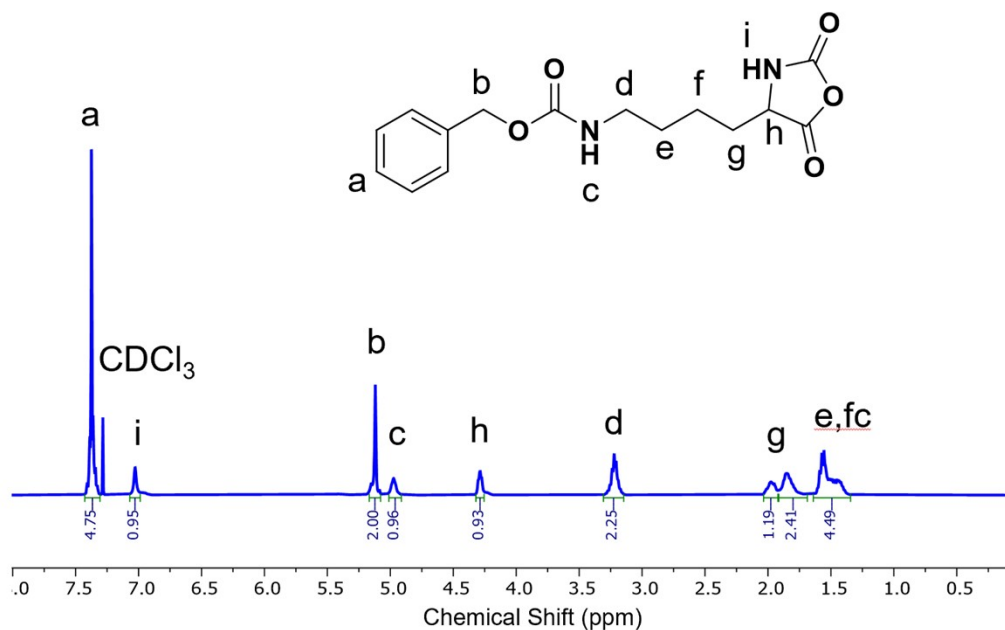

Figure S1:  $^1\text{H}$  NMR of ZLY-NCA in  $\text{CDCl}_3$ :  $\delta = 7.26$  ppm (s,  $\text{CDCl}_3$ ),  $\delta = 7.48$  ppm (m, 5H, Ph),  $\delta = 7.02$  ppm (NH),  $\delta = 5.12$  ppm (s, 2H,  $\text{PhCH}_2\text{O}$ ),  $\delta = 4.92$  ppm (NH),  $\delta = 4.28$  ppm (t, 1H, CH),  $\delta = 3.22$  ppm (q, 2H,  $\text{CH}_2\text{CH}_2\text{NH}$ ),  $\delta = 1.90$  ppm (m, 2H,  $\text{CH}_2\text{CH}_2\text{CH}$ ),  $\delta = 1.51$  ppm (m, 4H,  $\text{CH}_2\text{CH}_2\text{CH}_2$ )

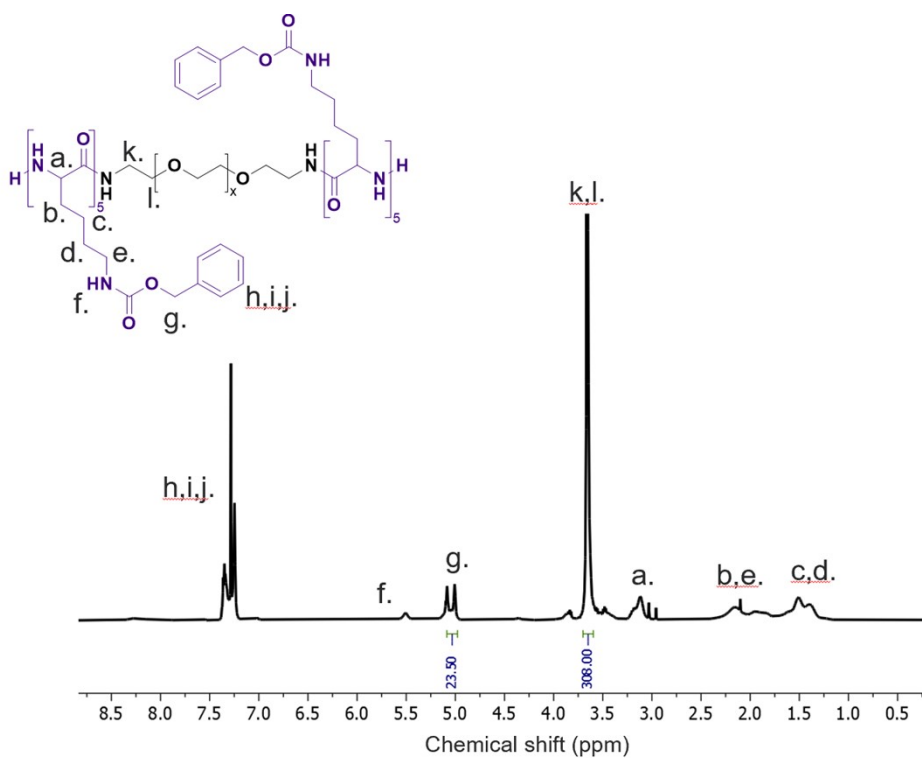

Figure S2:  $^1\text{H}$  NMR of  $\text{PZLY}_5\text{-}b\text{-PEG-}b\text{-PZLY}_5$  triblock copolymer. PZLY repeat length was confirmed *via* end group analysis of the carbobenzyloxy group, specifically the benzyl-adjacent

protons (peak at ~5.0 ppm) compared to the PEG backbone signal (3.64 ppm).  $\delta = 7.26$  ppm ( $\text{CDCl}_3$ ),  $\delta = 7.34$  ppm (m, Ph),  $\delta = 5.5$  ppm (NH)  $\delta = 5.04$  ppm (broad s,  $\text{PhCH}_2\text{O}$ ),  $\delta = 3.64$  ppm ( $\text{CH}_2\text{CH}_2\text{O}$ ),  $\delta = 3.12$  ppm (m,  $\text{CH}_2\text{CH}_2\text{CH}$ ),  $\delta = 2.15$  ppm (m,  $\text{CH}_2\text{CH}_2\text{CH}$ ),  $\delta = 2.0$  (DMAc)  $\delta = 1.48$  ppm (m,  $\text{CH}_2\text{CH}_2\text{CH}$ )

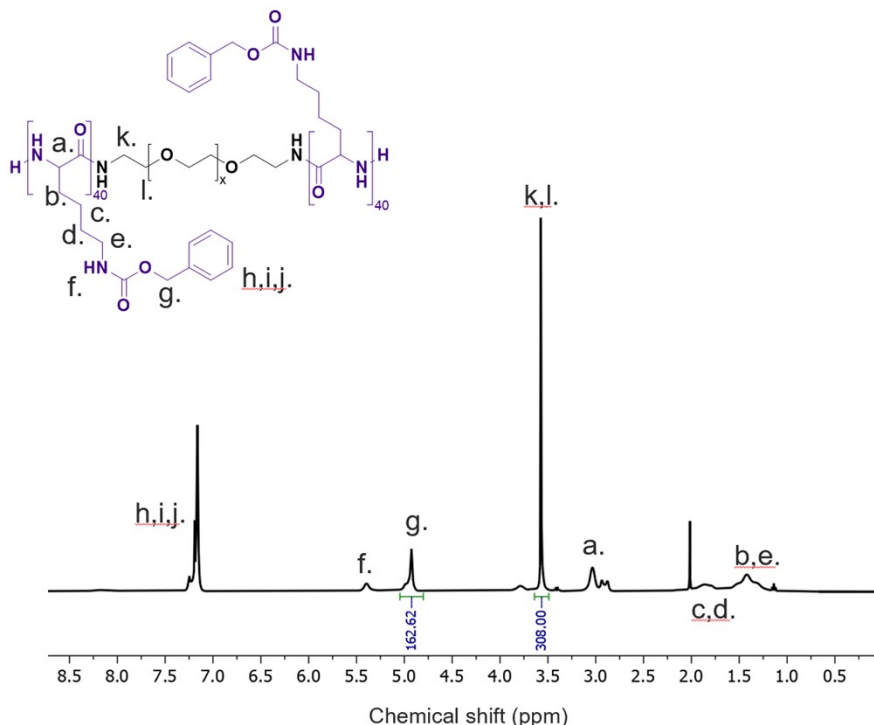

Figure S3:  $^1\text{H}$  NMR of  $\text{PZLY}_{40}\text{-}b\text{-PEG-}b\text{-PZLY}_{40}$  triblock copolymer. PZLY repeat length was confirmed *via* end group analysis of the carbobenzyloxy group, specifically the benzyl-adjacent protons (peak at ~5.0 ppm) compared to the PEG backbone signal (3.64 ppm).  $\delta = 7.26$  ppm ( $\text{CDCl}_3$ ),  $\delta = 7.34$  ppm (m, Ph),  $\delta = 5.5$  ppm (NH)  $\delta = 5.04$  ppm (broad s,  $\text{PhCH}_2\text{O}$ ),  $\delta = 3.64$  ppm ( $\text{CH}_2\text{CH}_2\text{O}$ ),  $\delta = 3.12$  ppm (m,  $\text{CH}_2\text{CH}_2\text{CH}$ ),  $\delta = 2.15$  ppm (m,  $\text{CH}_2\text{CH}_2\text{CH}$ ),  $\delta = 2.0$  (DMAc)  $\delta = 1.48$  ppm (m,  $\text{CH}_2\text{CH}_2\text{CH}$ )

Weight fractions of peptide in peptide polyurea hybrids (PPUs) are calculated using eqn S1, where  $x$ ,  $y$  and  $z$  are the molar quantities of the PZLY triblock, PEG and HDI, respectively, and  $M_{\text{ZLY}}$ ,  $M_{\text{PEG}}$  and  $M_{\text{HDI}}$  are the molecular weights of PZLY, PEG and HDI, respectively.

$$\text{wt}\%(\text{peptide}) = 100 \left( \frac{xM_{\text{PZLY}}}{xM_{\text{PZLY}} + yM_{\text{PEG}} + zM_{\text{HDI}}} \right) \quad (\text{S1})$$

Table S1: Number-average molecular weight, weight-average molecular weight, and dispersity of PPU hybrids calculated from gel permeation chromatography (GPC) using 0.5 wt% LiBr in DMAc as the mobile phase. Molecular weight distributions were generated using the calibration curve constructed for six poly(methyl methacrylate) standards (Agilent) in the range of 0.885 to 2,210 kg mol<sup>-1</sup>.

| Polymer | Number-Average Molecular Weight, $M_n$ (kg mol <sup>-1</sup> ) | Weight-Average Molecular Weight, $M_w$ (kg mol <sup>-1</sup> ) | Dispersity, $\bar{D}$ ( $M_w/M_n$ ) |
|---------|----------------------------------------------------------------|----------------------------------------------------------------|-------------------------------------|
| Z5-10   | 41.6                                                           | 110.3                                                          | 2.6                                 |
| Z40-10  | 43.2                                                           | 109.0                                                          | 2.5                                 |

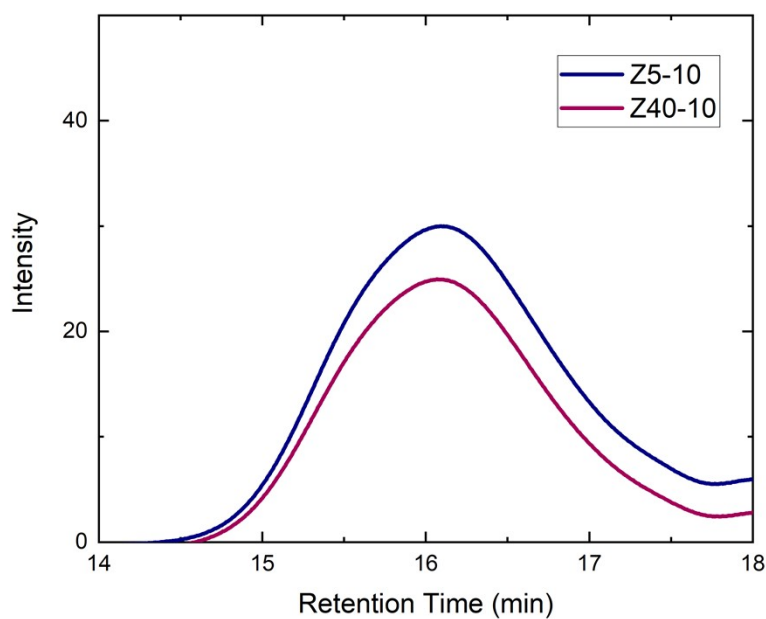

Figure S4: GPC traces of synthesized PPUs.

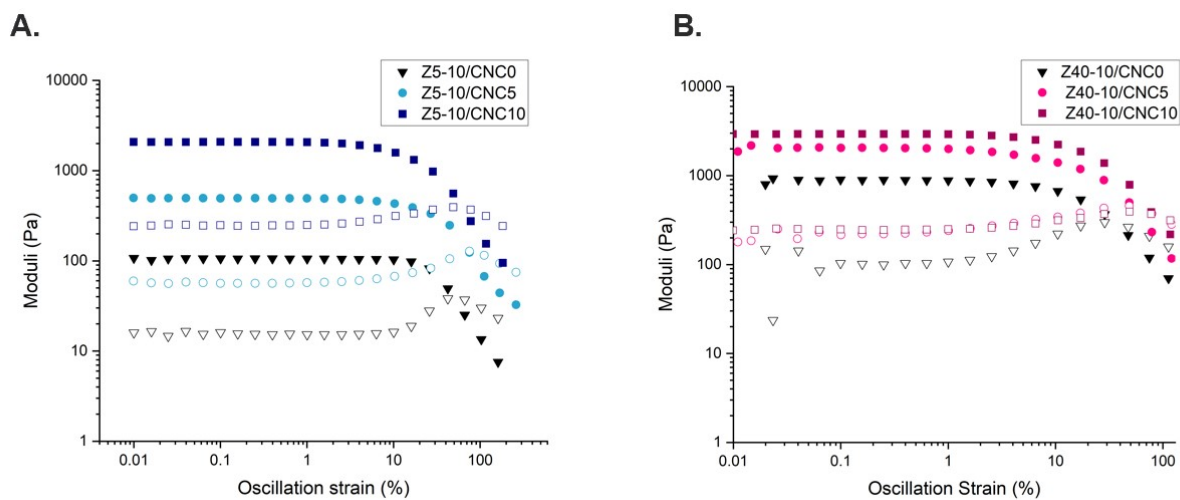

Figure S5: Amplitude sweeps of A. Z5-10/CNC series and B. Z40-10/CNC series. Closed symbols indicate storage moduli ( $G'$ ), while open symbols indicate loss moduli ( $G''$ ).

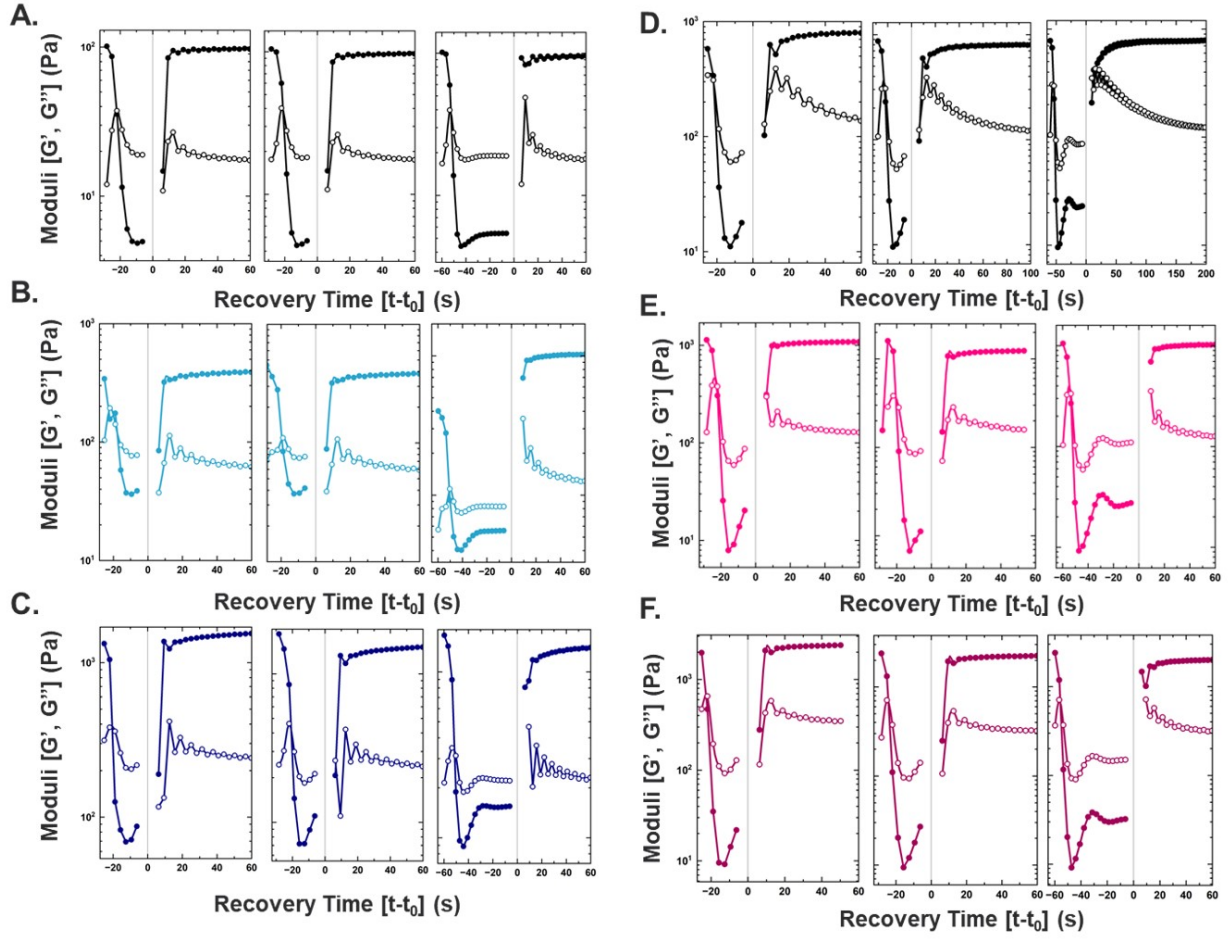

Figure S6: Injection simulation experiments of A. Z5-10/CNC0, B. Z5-10/CNC5, C. Z5-10/CNC10, D. Z40-10/CNC0. E. Z40-10/CNC5, F. Z40-10/CNC10. Closed symbols indicate storage moduli ( $G'$ ), while open symbols indicate loss moduli ( $G''$ ).

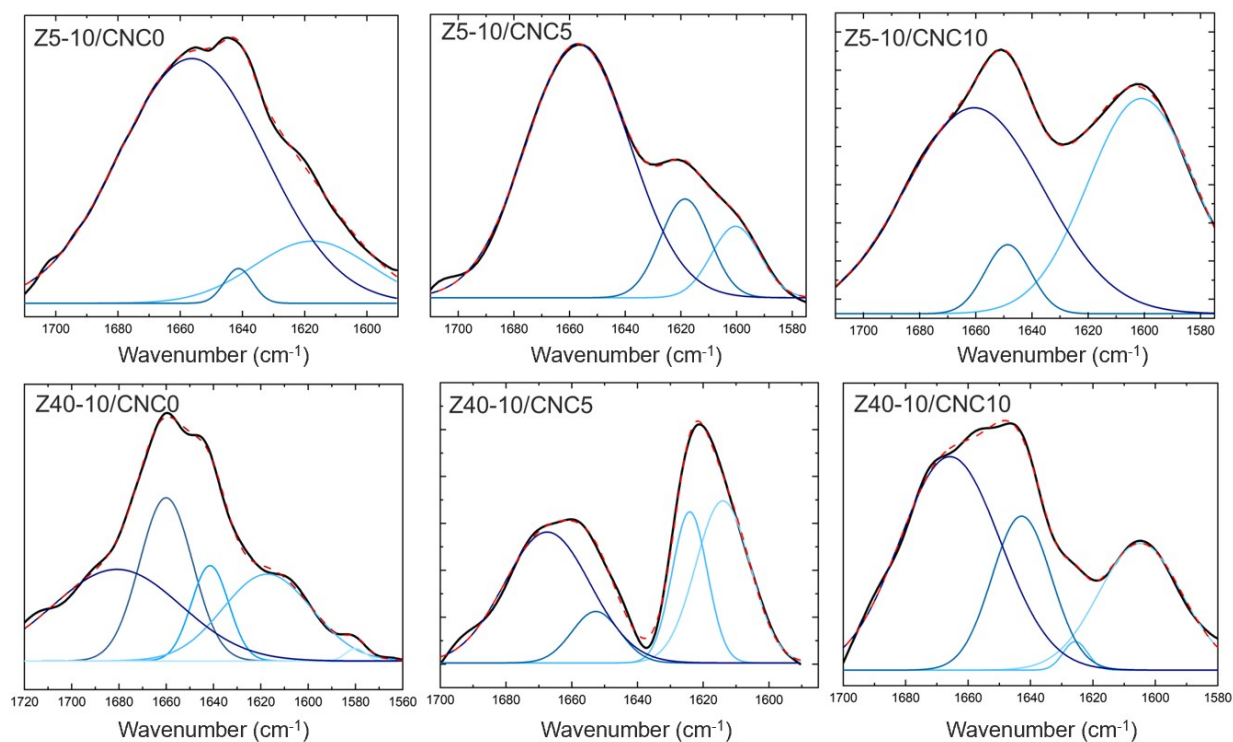

Figure S7: Gaussian deconvolutions of the amide I region of PPU/CNC hydrogels. The solid black line indicates the original curve, and the dashed red line is the integrated result of deconvoluted curves. All fits converged with an  $R^2$  value  $\geq 0.99$ .

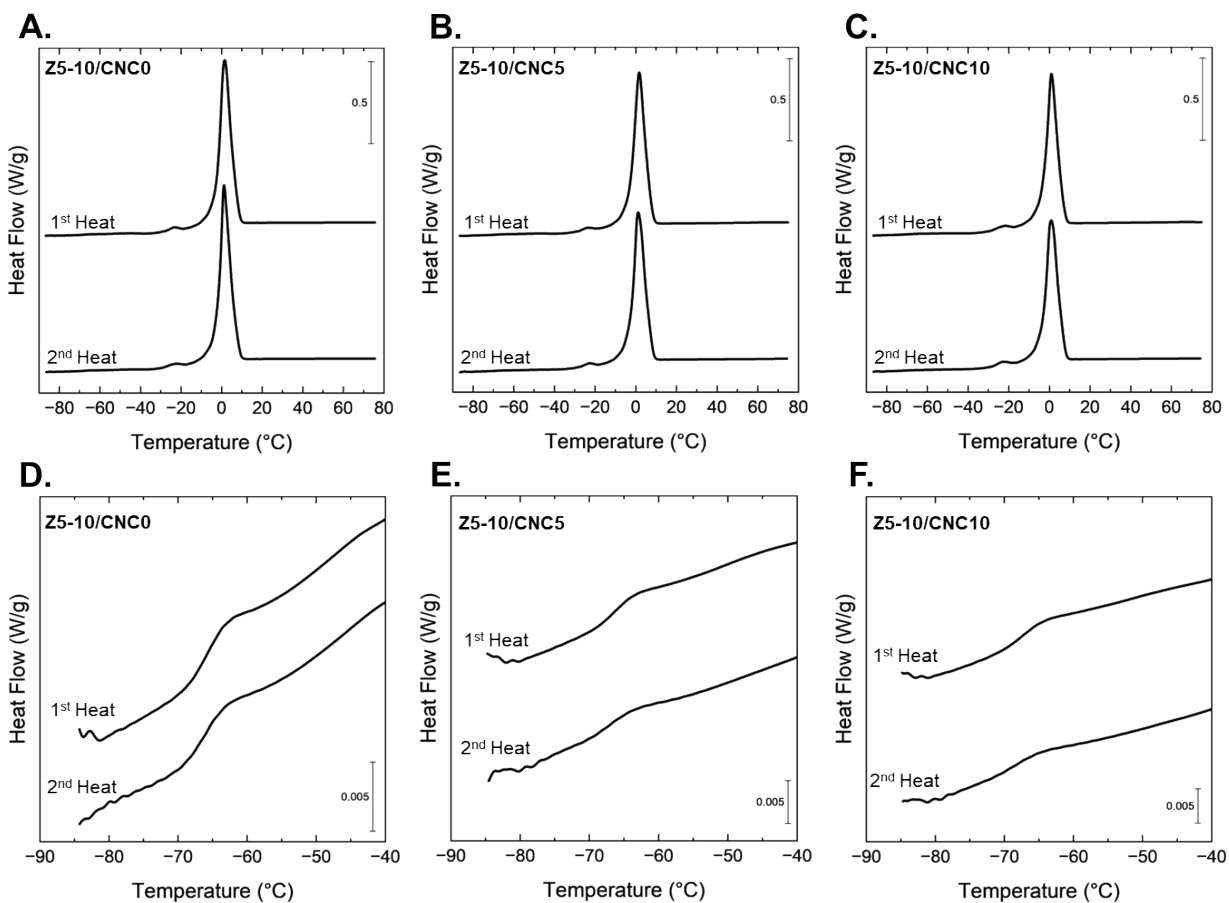

Figure S8: DSC plots of the Z5-10/CNC hydrogel series. Total heat flow curves for the 1<sup>st</sup> and 2<sup>nd</sup> heating traces highlight the water melting peaks of A. Z5-10/CNC0, B. Z5-10/CNC5, and C. Z5-10/CNC10. Reversing heat flow curves for the 1<sup>st</sup> and 2<sup>nd</sup> heating traces, highlighting the  $T_g$ s of D. Z5-10/CNC0, E. Z5-10/CNC5, and F. Z5-10/CNC10.



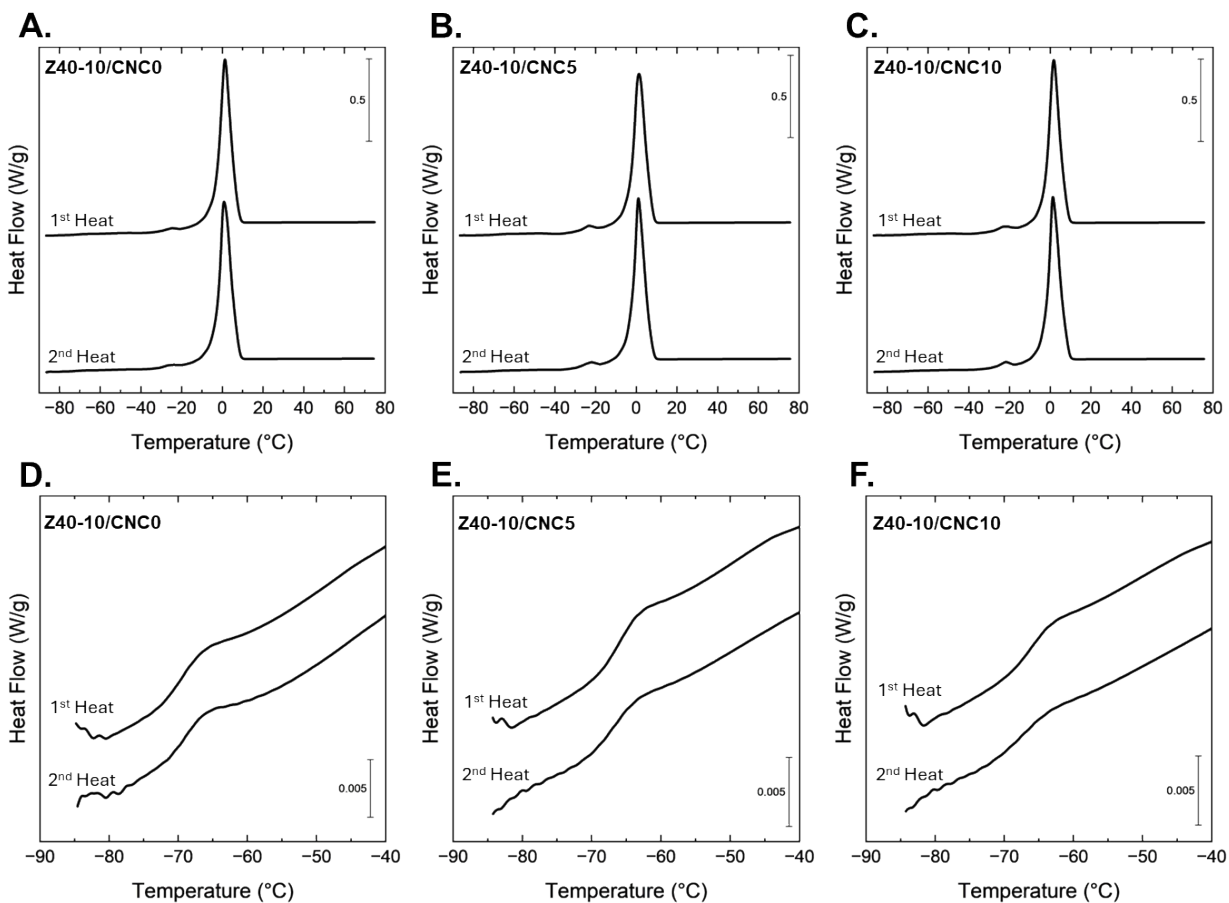

Figure S9: DSC plots of the Z5-10/CNC hydrogel series. Total heat flow curves for the 1<sup>st</sup> and 2<sup>nd</sup> heating traces highlighting the water melting peaks of A. Z40-10/CNC0, B. Z40-10/CNC5, and C. Z40-10/CNC10. Reversing heat flow curves for the 1<sup>st</sup> and 2<sup>nd</sup> heating traces, highlighting the  $T_g$ s of D. Z40-10/CNC0, E. Z40-10/CNC5, and F. Z40-10/CNC10.

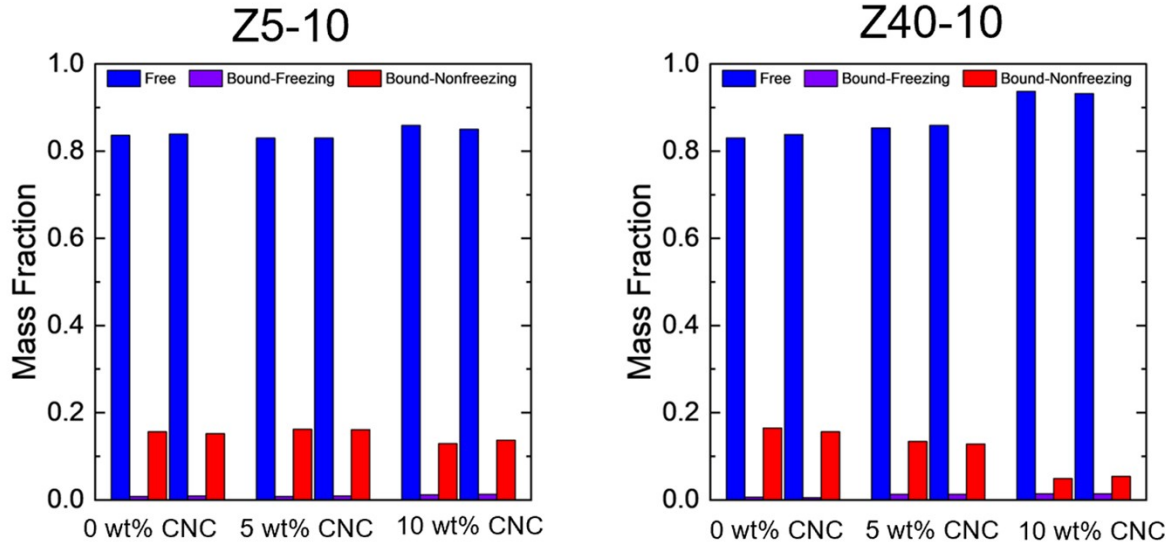

Figure S10: Fractions of free, bound-freezing, and bound-nonfreezing water in PPU hydrogels  
Calculations of bound/unbound water in PPU hydrogels:

Three forms of water are assumed to exist within hydrogels: 1) freezable free water, 2) freezable bound water, and 3) non-freezable water. Differential scanning calorimetry (DSC) can identify free water and freezable bound water by melting peaks at 0 °C and -20 °C, respectively. Non-freezable water is not detectable *via* DSC. The total water content ( $m_{H_2O}$ ) in the hydrogel is defined as,

$$m_{H_2O} = m_w - m_d \quad (S2)$$

wherein,  $m_w$  is the mass of the wet sample after equilibrium hydration, and  $m_d$  is the mass of the dry sample prior to submersion. The three forms of water present will sum to the total water content, written as,

$$m_{H_2O} = m_{ff} + m_{fb} + m_{nf} \quad (S3)$$

wherein,  $m_{ff}$  is the mass of free water,  $m_{fb}$  is the mass of freezable bound water, and  $m_{nf}$  is the mass fraction of non-freezable bound water. Freezable water fraction, can be described as,

$$x_f = x_{ff} + x_{fb} \quad (S4)$$

by division of the equilibrium melting enthalpy of water ( $\Delta H_{m,H2O}^0 = 333.5 \text{ J/g}$ ), written as,

$$x_f = \frac{\Delta H_{hydrogel}}{\Delta H_{m,H2O}^0} \quad (S5)$$

wherein,  $\Delta H_{hydrogel}$  is the melting enthalpy of water in hydrogel sample.  $x_f$  must be less than or equal to 1, with the remainder assumed to be the non-freezable water fraction.

Table S2:  $T_g$ s and  $\Delta C_p$  of PPU hydrogels

| Sample       | Scan                 | $T_g$<br>(°C) | $\Delta C_p$<br>(J/g <sub>PPU</sub> °C) |
|--------------|----------------------|---------------|-----------------------------------------|
| Z5-10        | 1 <sup>st</sup> Heat | -66           | 1.62                                    |
|              | 2 <sup>nd</sup> Heat | -66           | 1.39                                    |
| Z5-10/CNC5   | 1 <sup>st</sup> Heat | -66           | 1.31                                    |
|              | 2 <sup>nd</sup> Heat | -67           | 0.99                                    |
| Z5-10/CNC10  | 1 <sup>st</sup> Heat | -68           | 1.63                                    |
|              | 2 <sup>nd</sup> Heat | -68           | 1.13                                    |
| Z40-10       | 1 <sup>st</sup> Heat | -70           | 1.46                                    |
|              | 2 <sup>nd</sup> Heat | -69           | 1.27                                    |
| Z40-10/CNC5  | 1 <sup>st</sup> Heat | -66           | 1.56                                    |
|              | 2 <sup>nd</sup> Heat | -67           | 1.27                                    |
| Z40-10/CNC10 | 1 <sup>st</sup> Heat | -66           | 1.28                                    |
|              | 2 <sup>nd</sup> Heat | -67           | 1.06                                    |

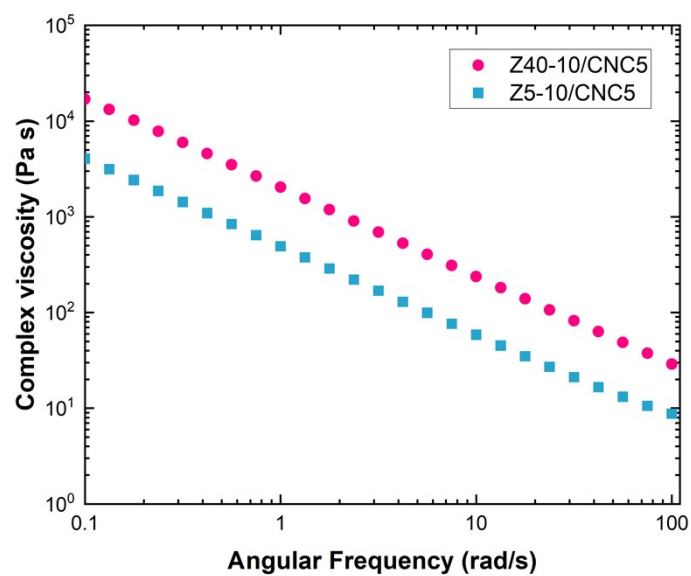

Figure S11: Example of shear-thinning behavior of PPU/CNC hydrogels.

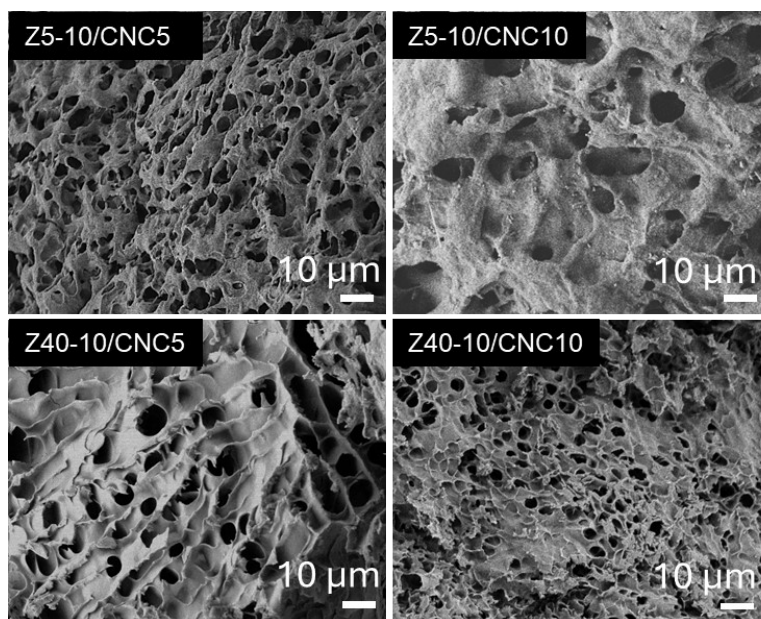

Figure S12: Additional SEM images of lyophilized hydrogels showing continuous porous networks.

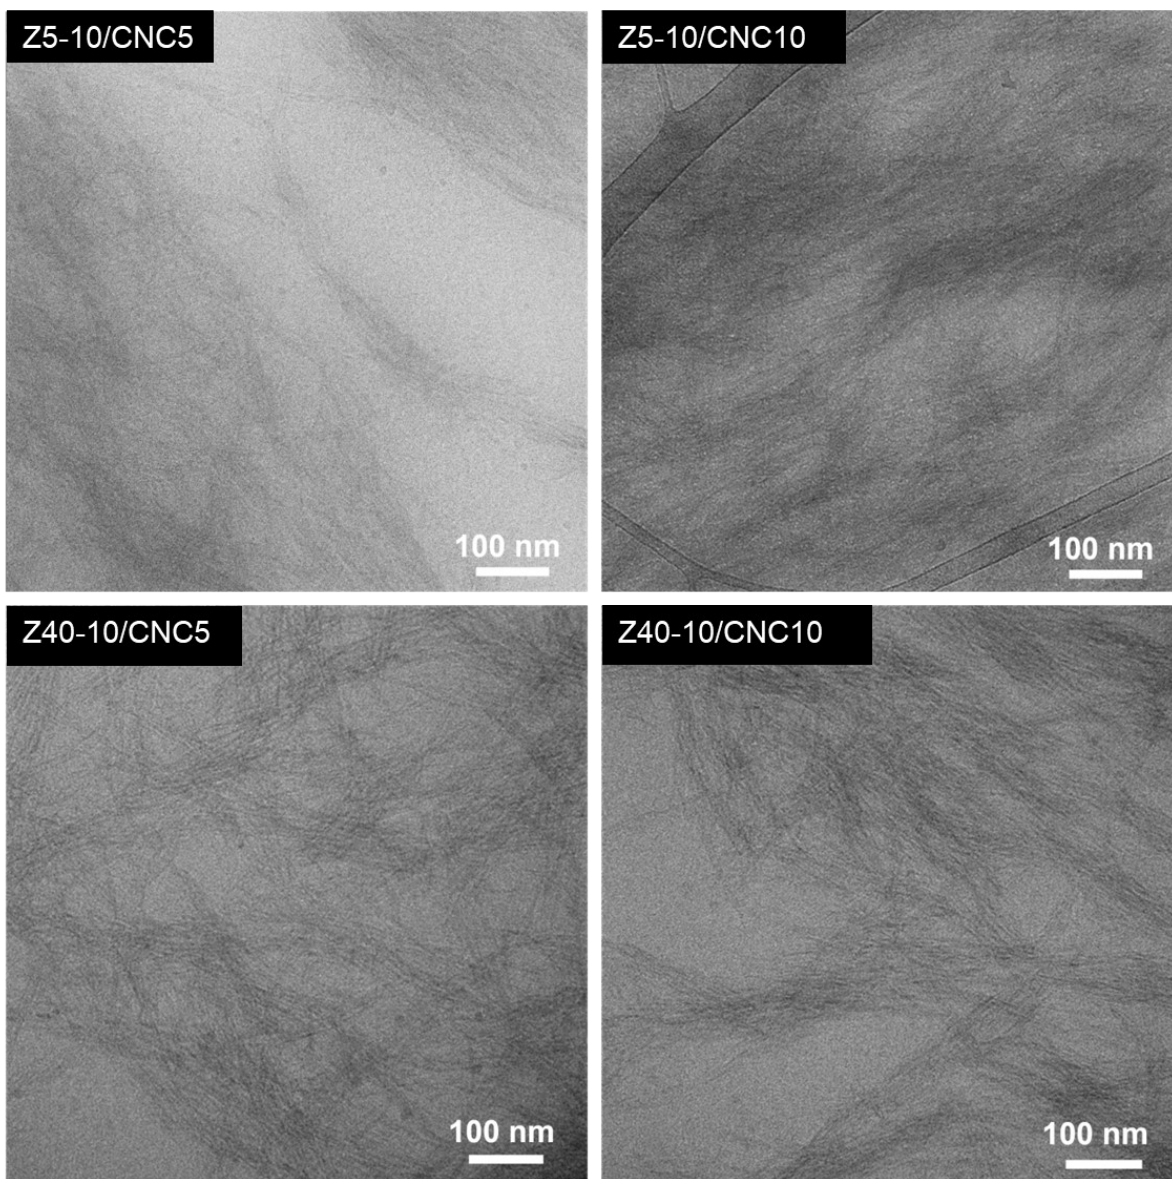

Figure S13: Enlarged cryo-TEM images of hydrogels without contrasting adjustments, showcasing the fibrous networks.

**Abbreviations:**

|                   |                                            |
|-------------------|--------------------------------------------|
| CDCl <sub>3</sub> | Deuterated chloroform                      |
| CNC               | Cellulose nanocrystal                      |
| DSC               | Differential scanning calorimetry          |
| GPC               | Gel permeation chromatography              |
| HDI               | Hexamethylene diisocyanate                 |
| NMR               | Nuclear magnetic resonance                 |
| PEG               | Poly(ethylene glycol)                      |
| PPU               | Peptide-polyurea                           |
| PTIR              | Photothermal infrared spectroscopy         |
| PZLY              | Poly( $\epsilon$ -carbobenzyloxy-L-lysine) |
| ZLA-NCA           | Carbobenzyloxy-L-lysine N-carboxyanhydride |
| $T_g$             | Glass transition temperature               |
| SEM               | Scanning electron microscopy               |
| Cryo-TEM          | Cryogenic transmission electron microscopy |

PPU hydrogel samples are labeled with the nomenclature **ZN-X/CNCY**, where **N** denotes the peptide repeat length, **X** represents peptide weight percent in the polyurea, and **Y** denotes the CNC wt% loading.
